# Supplementary material for: Microgeographical, inter-individual, and intra-individual variation in the flower characters of Iberian pear Pyrus bourgaeana (Rosaceae)
Source: PubMed Central journal article supplement — Oecologia. 2011 Dec 27;169(3):713–22. doi: 10.1007/s00442-011-2232-5 (PMC3375002; doi:10.1007/s00442-011-2232-5), 2011-12-27
Supplement: 442_2011_2232_MOESM1_ESM.pdf [file 442_2011_2232_MOESM1_ESM.pdf]

**Żywiec M., Fedriani J. M., Delibes M.** Microgeographical, inter-individual, and intra-individual variation in the flower characters of Iberian pear *Pyrus bourgaeana* (Rosaceae)

**Online Resource 1.** Number of sampled trees, inflorescences, and flowers in 2008 and 2009 in the five localities. The number of trees in common for the two study years is given in parentheses and the number of flowers in which the concentration of floral sugar was measured is given in brackets

|                      | Number of samples   | Hato Ratón | Hinojos   | Matasgordas | Rocina   | Vera    | In total  |
|----------------------|---------------------|------------|-----------|-------------|----------|---------|-----------|
| <i>Flower</i>        |                     |            |           |             |          |         |           |
| <i>morphological</i> |                     |            |           |             |          |         |           |
| <i>characters</i>    | Trees 2008          | 14         | 12        | 15          | 11       | 12      | 64        |
|                      | Trees 2009          | 11 (10)    | 9 (7)     | 15 (13)     | 11 (9)   | 8 (7)   | 54 (46)   |
|                      | Inflorescences 2008 | 72         | 59        | 75          | 54       | 56      | 316       |
|                      | Inflorescences 2009 | 51         | 41        | 73          | 50       | 40      | 255       |
|                      | Flowers 2008        | 140        | 109       | 141         | 89       | 109     | 588       |
|                      | Flowers 2009        | 94         | 73        | 142         | 96       | 78      | 483       |
| <i>Nectar</i>        |                     |            |           |             |          |         |           |
| <i>characters</i>    |                     |            |           |             |          |         |           |
|                      | Trees 2008          | 8          | 11        | 8           | 6        | 9       | 42        |
|                      | Trees 2009          | 8 (4)      | 2 (2)     | 6 (5)       | 6 (4)    | 4 (3)   | 26 (18)   |
|                      | Inflorescences 2008 | 23         | 27        | 14          | 11       | 17      | 92        |
|                      | Inflorescences 2009 | 19         | 3         | 10          | 14       | 19      | 65        |
|                      | Flowers 2008        | 148 [46]   | 158 [100] | 125 [31]    | 98 [37]  | 145 [8] | 674 [222] |
|                      | Flowers 2009        | 142 [122]  | 15 [10]   | 72 [38]     | 112 [89] | 57 [42] | 398 [301] |

**Online Resorce 2.** Flower morphological and nectar characters (mean  $\pm$  SE) of *Pyrus bourgaeana* in five localities of SW Spain in 2008 and 2009

|                                      |      | HatoRaton          |               | Hinojos            |               | Matasgordas        |                | Rocina             |                 | Vera               |                 | In total           |                 |
|--------------------------------------|------|--------------------|---------------|--------------------|---------------|--------------------|----------------|--------------------|-----------------|--------------------|-----------------|--------------------|-----------------|
|                                      |      | Mean $\pm$ SE      | Range         | Mean $\pm$ SE      | Range         | Mean $\pm$ SE      | Range          | Mean $\pm$ SE      | Range           | Mean $\pm$ SE      | Range           | Mean $\pm$ SE      | Range           |
| Number of flowers per inflorescence  | 2008 | 9.43 $\pm$ 0.44    | 6-20          | 9.63 $\pm$ 0.47    | 5-14          | 9.31 $\pm$ 0.42    | 3-14           | 9.09 $\pm$ 0.48    | 4-13            | 9.01 $\pm$ 0.46    | 5-12            | 9.29 $\pm$ 0.20    | 3-20            |
|                                      | 2009 | 9.55 $\pm$ 0.47    | 6-15          | 9.73 $\pm$ 0.51    | 6-16          | 9.83 $\pm$ 0.44    | 6-18           | 9.53 $\pm$ 0.49    | 6-15            | 9.45 $\pm$ 0.51    | 4-13            | 9.62 $\pm$ 0.22    | 4-18            |
| Number of petals                     | 2008 | 5.15 $\pm$ 0.14    | 5-8           | 5.15 $\pm$ 0.15    | 4-10          | 5.16 $\pm$ 0.14    | 4-10           | 5.43 $\pm$ 0.17    | 5-10            | 5.20 $\pm$ 0.16    | 5-9             | 5.22 $\pm$ 0.07    | 4-10            |
|                                      | 2009 | 5.16 $\pm$ 0.15    | 5-7           | 5.03 $\pm$ 0.15    | 4-12          | 5.14 $\pm$ 0.14    | 3-14           | 5.48 $\pm$ 0.17    | 5-10            | 5.16 $\pm$ 0.16    | 5-10            | 5.19 $\pm$ 0.07    | 3-12            |
| Petal lenght (mm)                    | 2008 | 12.40 $\pm$ 0.41   | 8.56-16.92    | 11.85 $\pm$ 0.43   | 7.44-16.07    | 13.25 $\pm$ 0.40   | 8.38-19.63     | 11.05 $\pm$ 0.44   | 6.70-14.95      | 11.09 $\pm$ 0.44   | 7.82-14.78      | 11.93 $\pm$ 0.19   | 6.70-19.63      |
|                                      | 2009 | 11.77 $\pm$ 0.41   | 9.07-15.26    | 12.02 $\pm$ 0.43   | 9.34-17.70    | 12.77 $\pm$ 0.40   | 7.84-17.48     | 11.89 $\pm$ 0.44   | 7.91-14.42      | 11.60 $\pm$ 0.45   | 8.13-16.28      | 12.01 $\pm$ 0.19   | 7.84-17.70      |
| Petal area (mm <sup>2</sup> )        | 2008 | 83.49 $\pm$ 6.08   | 38.80-170.24  | 72.57 $\pm$ 6.31   | 31.71-117.25  | 97.38 $\pm$ 5.87   | 37.72-218.00   | 77.11 $\pm$ 6.55   | 28.62-149.55    | 72.68 $\pm$ 6.54   | 26.34-141.23    | 80.65 $\pm$ 2.81   | 26.34-218.00    |
|                                      | 2009 | 74.36 $\pm$ 6.12   | 33.43-113.98  | 73.32 $\pm$ 6.36   | 23.49-129.20  | 87.65 $\pm$ 5.87   | 33.62-174.80   | 83.14 $\pm$ 6.53   | 35.42-120.87    | 78.17 $\pm$ 6.59   | 34.00-147.59    | 79.33 $\pm$ 2.81   | 23.49-174.80    |
| Corolla area (mm <sup>2</sup> )      | 2008 | 429.54 $\pm$ 34.19 | 202.38-982.23 | 369.65 $\pm$ 35.62 | 183.20-794.57 | 503.65 $\pm$ 33.00 | 250.83-1019.05 | 423.87 $\pm$ 36.97 | 157.10-1109.32  | 383.96 $\pm$ 36.80 | 132.13-929.39   | 422.11 $\pm$ 15.80 | 132.13-1019.05  |
|                                      | 2009 | 382.50 $\pm$ 34.64 | 178.80-590.31 | 365.63 $\pm$ 36.23 | 198.13-615.85 | 448.20 $\pm$ 33.00 | 166.16-849.87  | 457.07 $\pm$ 36.89 | 271.85-756.74   | 407.62 $\pm$ 37.49 | 196.33-955.65   | 412.20 $\pm$ 15.96 | 166.16-955.65   |
| Calix area (mm <sup>2</sup> )        | 2008 | 30.51 $\pm$ 0.86   | 14.22-47.58   | 29.84 $\pm$ 1.89   | 15.85-53.63   | 29.52 $\pm$ 1.75   | 11.77-50.81    | 30.25 $\pm$ 1.96   | 14.55-57.33     | 34.51 $\pm$ 1.95   | 9.96-52.85      | 30.93 $\pm$ 0.84   | 9.96-57.33      |
|                                      | 2009 | 27.78 $\pm$ 1.84   | 14.07-35.51   | 30.13 $\pm$ 1.92   | 20.00-49.50   | 28.02 $\pm$ 1.75   | 12.11-46.21    | 30.59 $\pm$ 1.96   | 17.71-57.90     | 35.85 $\pm$ 1.99   | 18.52-50.63     | 30.47 $\pm$ 0.85   | 12.11-57.90     |
| Quantity of nectar ( $\mu$ l)        | 2008 | 1.70 $\pm$ 0.41    | 0-9.8         | 3.31 $\pm$ 0.41    | 0-18.5        | 0.83 $\pm$ 0.46    | 0-6.3          | 1.72 $\pm$ 0.51    | 0-7.8           | 2.43 $\pm$ 0.45    | 0-8.8           | 2.00 $\pm$ 0.20    | 0-18.5          |
|                                      | 2009 | 4.01 $\pm$ 0.41    | 0-12.9        | 1.72 $\pm$ 0.77    | 0.2-5.2       | 1.62 $\pm$ 0.52    | 0-5.2          | 2.31 $\pm$ 0.50    | 0-8.1           | 0.57 $\pm$ 0.55    | 0-10.7          | 2.05 $\pm$ 0.25    | 0-12.9          |
| Concentration of sugar in nectar (%) | 2008 | 21.48 $\pm$ 0.10   | 0.5-33.5      | 11.55 $\pm$ 0.08   | 3.0-34.0      | 17.75 $\pm$ 0.17   | 8.0-33.0       | 20.40 $\pm$ 0.13   | 7.5 $\geq$ 35.0 | 33.97 $\pm$ 0.33   | 6.8 $\geq$ 35.0 | 20.58 $\pm$ 0.03   | 0.5 $\geq$ 35.0 |
|                                      | 2009 | 7.78 $\pm$ 0.07    | 4.5-25.0      | 26.46 $\pm$ 0.30   | 12.0-12.5     | 20.13 $\pm$ 0.14   | 8 $\geq$ 35.0  | 15.12 $\pm$ 0.10   | 3.0 $\geq$ 35.0 | 17.41 $\pm$ 0.18   | 5.0 $\geq$ 35.0 | 16.90 $\pm$ 0.03   | 3.0 $\geq$ 35.0 |
